# Supplementary material for: Giving women WOICE postpartum: Prevalence of maternal morbidity in high-risk pregnancies using the WHO-WOICE instrument
Source: Research Square preprint supplement (doi:10.21203/rs.3.rs-26017/v3), 2021-01-15
Supplement: Supplementary file 1 [file 3f02be03fd054cd9d49df8ca.docx]

| **Table 7:** Evaluation of all conditions considered in the WOICE, according to abnormal findings and its combinations. Clinical, social, mental and functional impairmentare considered. | | | | | | | |
| --- | --- | --- | --- | --- | --- | --- | --- |
|  | **Sexual** | **Anxiety** | **Depression** | **WHODAS** | **Substance**  **use** | **Violence** | **Clinical Conditions** |
| **Sexual Satisfaction*** | 18 (16.5%) | 9  (8.3%) | 6  (8%) | 1  (0.9%) | 4  (3.7%) | 1  (1%) | 6  (5.6%) |
| **Anxiety** |  | 101  (37%) | **59**  **(38.6%)** | 18  (6.8%) | 23  (8.4%) | 12  (4.6%) | **36**  **(13.3%)** |
| **Depression**** |  |  | 73  (47.7%) | 16  (11%) | 16  (10.5%) | 7  (4.7%) | **22**  **(14.6%)** |
| **WHODAS** |  |  |  | 22  (8.3%) | 4  (1,5%) | 3  (1.2%) | 6  (2.3%) |
| **Substance**  **Use** |  |  |  |  | 52  (19.1 %) | 10  (3.8%) | 16  (5.9%) |
| **Violence** |  |  |  |  |  | 30  (11.5%) | 15  (5.8%) |
| **Clinical Conditions** |  |  |  |  |  |  | 153  (56.5%) |
| The following definitions were considered to define any of the variables as impaired: Sexual: any negative response for sexual satisfaction after childbirth; Anxiety: a score > 10 in specific instrument that is part of the WHOICE tool; Depression: a score > 10 in specific instrument that is part of the WHOICE tool; Functioning: a WHODAS score ≥ 37.4; Substance use: any use after childbirth; Violence: any report of physical or psychological violence after childbirth; Clinical condition: reporting of any clinical condition after childbirth, demanding medical assistance.  Missing for each of the categories: Sexual = 353; Anxiety = 8; Depression = 321; WHODAS = 23; Substance use = 10; Violence = 12; Clinical conditions = 13.  *sexual satisfaction: women who declared no sexual activity after childbirth were not further asked about satisfaction.  **depression: the depression instrument was only applied if women answered that they were “feeling depressed or hopeless” in the first question.” | | | | | | | |
